# Supplementary material for: Controls on the hydraulic geometry of alluvial channels: bank stability to gravitational failure, the critical-flow hypothesis, and conservation of mass and energy
Source: Copernicus journal article supplement (doi:10.5194/esurf-2020-44), 2020-06-22
Supplement: Supplementary file 1 [file esurf-2020-44-supplement.zip]

Archive with 3 entries (3 files):
- predicted_and_observed_bankfull_depth.xlsx
- supplementaryfigures.pdf
- usclayavfp10.txt
