# Supplementary material for: Controls on the hydraulic geometry of alluvial channels: bank stability to gravitational failure, the critical-flow hypothesis, and conservation of mass and energy
Source: Copernicus journal article supplement (doi:10.5194/esurf-2020-44), 2020-06-22
Supplement: Supplementary file 1 [file esurf-2020-44-supplement.zip › predicted_and_observed_bankfull_depth.xlsx]

## Sheet: data
USGS Station ID	Q (m^3/s)	h_obs (m)	percent clay content	h_pred (m)
3069500	988.261	4.9365	10.9675	3.83862
3102950	35.6705	3.5757	12.7231	4.45308
3125000	13.7779	2.21304	11.2525	3.93837
3139000	68	5.18561	9.15273	3.20346
3140000	24.8375	3.62363	8.9485	3.13197
3146500	314.998	4.46318	12.423	4.34805
3157500	208.717	5.24064	11.3611	3.97639
3202400	151.678	4.69716	5.16852	1.80898
3202480	158.176	4.81594	5.30775	1.85771
3214000	566.938	10.6864	7.59179	2.65713
3230500	295.048	4.272	13.2846	4.64961
3231000	198.221	3.46861	15.9478	5.58173
3241600	27.2177	4.20724	15.7666	5.51831
3248500	50.9861	5.68628	11.5717	4.05009
3281000	386.995	10.6937	12.2314	4.28099
3292500	24.2716	4.52262	12.0594	4.22079
3298000	281.514	4.16462	18.1309	6.34581
3299000	295.283	6.38795	18.3319	6.41617
3307000	253.155	6.38172	19.935	6.97725
3325500	96.7653	4.51971	26.6963	9.3437
3334500	140.074	4.22844	5.41421	1.89497
3340500	1640.33	8.19225	13.0856	4.57996
3345500	224.452	7.20086	14.8442	5.19547
3357000	497.632	5.81021	10.2794	3.59779
3361500	177.338	4.9006	13.4518	4.70813
3363900	246.494	4.46075	11.3502	3.97257
3365000	139.533	4.21999	14.1833	4.96415
3367000	326.343	7.59059	15.9878	5.59573
3371500	997.295	9.51468	16.6104	5.81364
3380500	419.777	7.0028	16.1343	5.647
3413200	95.904	2.78535	21.9055	7.66692
3428200	310.453	5.86446	29.5485	10.342
3431800	192.45	3.49054	20.4168	7.14588
3438000	156.62	5.82537	24.7912	8.67692
3571600	271.174	4.46506	20.6755	7.23642
3592200	220.173	5.77541	11.9682	4.18887
3592500	305.411	5.25412	14.0088	4.90308
3593800	101.349	3.72838	17.5938	6.15783
3602500	234.452	4.90531	19.627	6.86945
3604000	620.789	8.01319	17.3274	6.06459
5311400	29.8599	3.4374	16.9515	5.93302
5313500	92.0009	2.97337	15.8129	5.53451
5316500	153.993	3.64054	17.2094	6.02329
5316570	25.4402	3.98957	12.4374	4.35309
5316950	85.2169	7.92361	11.0833	3.87915
5317000	197.576	5.01144	12.9704	4.53964
5320400	5.29381	6.17588	19.1008	6.68528
5320480	49.6832	3.45976	10.5481	3.69183
5325000	378.742	5.38515	10.5762	3.70167
5330000	520.16	9.2523	6.05697	2.11994
5341900	4.40113	4.11346	3.69751	1.29413
5345000	489.567	8.0623	7.70602	2.69711
5355200	443.215	4.21035	8.46187	2.96165
5364000	158.179	3.55097	3.40601	1.1921
5368000	77.1734	3.45328	1.17271	0.410448
5376500	42.3713	3.0396	6.11679	2.14088
5378200	44.0675	4.98506	3.31508	1.16028
5382500	18.35	2.59066	1	0.35
5384200	13.2854	6.0782	12.9896	4.54636
5385000	291.687	4.8159	8.4123	2.9443
5387500	62.2996	2.12304	12.7693	4.46925
5388250	130.566	4.55001	12.0879	4.23076
5389000	165.635	4.08812	14.1804	4.96314
5407200	6.34326	3.76378	1.72891	0.605118
5410490	60.4717	4.28083	8.42939	2.95029
5414500	253.083	5.87147	13.287	4.65045
5415000	161.759	4.17379	18.3043	6.40651
5424000	28.8143	3.45504	6.93026	2.42559
5432500	79.0411	4.75108	18.9105	6.61867
5434500	88.8721	4.66052	15.725	5.50375
5435500	82.7999	4.37735	19.8469	6.94642
5436500	74.9047	2.19758	6.94148	2.42952
5449500	56.1216	4.04305	14.5128	5.07948
5451500	168.633	6.10264	18.9875	6.64562
5451900	146.845	7.00148	22.6341	7.92193
5453100	251.087	5.60619	20.4772	7.16702
5453950	10.5142	7.60364	17.5791	6.15268
5455000	7.09212	2.04661	14.5312	5.08592
5455100	34.5005	2.89486	18.6309	6.52081
5455500	201.533	6.1178	21.3772	7.48202
5458900	153.864	3.94048	7.84065	2.74423
5462000	138.445	3.71239	8.33436	2.91703
5463000	64.7566	3.28443	8.8143	3.085
5463500	66.3996	4.62687	17.6834	6.18919
5467000	43.7929	8.54579	13.9886	4.89601
5467500	71.9302	7.75206	16.7243	5.8535
5471000	351.964	7.43576	16.1741	5.66093
5471050	178.676	5.64763	17.1062	5.98717
5472500	162.325	6.83044	19.819	6.93665
5476000	61.4739	3.52505	15.4494	5.40729
5476500	94.454	3.83699	10.5843	3.70451
5481950	80.8477	4.0629	14.3504	5.02264
5482500	151.607	4.55555	15.5032	5.42612
5484500	460.773	5.81542	16.2635	5.69222
5485640	115.386	4.22761	16.7208	5.85228
5486490	327.184	7.21117	26.9208	9.42228
5487470	221.967	7.27691	24.4171	8.54598
5487980	218.338	7.92286	23.322	8.1627
5489000	202.743	8.20497	19.3672	6.77852
5495000	143.26	5.2818	9.42346	3.29821
5502300	240.081	5.78724	27.0129	9.45451
5502500	252.939	6.84446	27.1963	9.5187
5504800	262.872	6.76694	25.1045	8.78657
5506500	299.856	7.28875	24.5513	8.59295
5506800	143.836	7.50581	27.2108	9.52378
5507000	254.963	6.1917	27.0439	9.46537
5508000	979.389	7.9687	14.9979	5.24926
5514500	379.39	8.31515	15.0241	5.25843
5515000	404.526	7.35419	2.61881	0.916583
5522000	17.2525	3.49519	8.41086	2.9438
5551700	16.277	2.38664	12.7172	4.45102
5569500	328.228	6.99457	19.3295	6.76532
5570910	322.107	7.14612	23.953	8.38355
5577500	145.622	5.6948	20.6031	7.21108
5578500	59.452	6.33498	20.7052	7.24682
5579500	43.2476	6.11006	22.9601	8.03604
5580500	95.2976	3.92343	19.6769	6.88691
5585000	179.204	6.77584	19.2987	6.75454
5587000	183.822	7.00039	17.6543	6.179
5588000	28.9391	4.7196	17.5315	6.13603
5591550	24.4969	3.53467	20.9358	7.32753
5593000	203.746	8.10982	20.9423	7.3298
5594000	104.994	5.9894	20.9326	7.32641
5599640	51.5228	5.21308	16.3336	5.71676
7014500	458.543	7.31802	20.7507	7.26274
7015720	416.586	6.40632	16.0162	5.60567
7023000	131.203	5.42884	11.7123	4.09931
7025500	162.284	5.89565	10.9774	3.84209
7027500	152.717	5.62132	8.42318	2.94811
7030240	228.017	6.86305	8.27998	2.89799
7030280	267.53	6.97289	8.87648	3.10677
7031650	239.046	5.95579	8.30301	2.90605
7037500	844.116	8.18874	14.7878	5.17573
7077100	77.4205	5.36431	18.1385	6.34847
7264000	55.9698	7.44553	27.9071	9.76748
7277730	233.876	5.27087	7.83881	2.74358
7283000	599.721	8.55784	18.7389	6.55861
7290000	501.696	11.828	9.91165	3.46908
7290690	304.321	6.87613	9.97548	3.49142
7359610	634.192	6.48991	15.5175	5.43112
7361500	288.446	7.33219	13.7855	4.82493
7362100	121.68	6.22297	9.36613	3.27815
7362500	61.4874	4.29697	15.3069	5.35741
7363000	583.198	6.85671	15.0753	5.27635
7365000	311.277	13.5449	7.79371	2.7278
7365500	113.731	6.04326	6.58994	2.30648
7369680	50.1202	6.65457	33.5067	11.7273
6085800	172.375	2.3434	9.83319	3.44162
6091700	81.8522	2.07383	15.236	5.3326
6099500	253.399	3.5547	17.9202	6.27207
6108000	57.5712	2.99816	14.1939	4.96786
6125680	1.25872	2.53052	19.8391	6.94368
6130500	114.421	3.39917	22.9756	8.04146
6130940	3.94338	4.1464	9.74987	3.41245
6139500	8.2354	2.4789	14.5386	5.08851
6142400	7.75177	2.16494	14.9263	5.2242
6151500	21.9396	2.47422	18.771	6.56985
6155030	73.1895	6.1939	24.4603	8.5611
6169000	7.14052	2.94701	19.5062	6.82717
6172310	191.67	7.61644	22.7551	7.96428
6174300	4.92074	2.09955	24.0889	8.43111
6178000	19.5172	2.21235	14.9044	5.21654
6181000	107.81	4.85428	17.7402	6.20907
6211000	24.4644	2.00282	16.2062	5.67217
6270000	24.3411	2.60385	17.0644	5.97254
6274250	24.1871	2.39606	17.4289	6.10011
6308400	34.7767	3.39354	16.8419	5.89466
6312700	16.1152	2.30528	13.1602	4.60607
6313700	27.8793	3.10676	13.5063	4.7272
6334500	88.8176	4.55541	12.3926	4.33741
6336000	396.901	4.66539	8.38243	2.93385
6339100	59.6953	4.16666	11.8988	4.16458
6339500	87.0416	6.89595	13.8507	4.84774
6343000	40.95	6.22618	12.1741	4.26093
6344600	31.4962	4.4807	14.0051	4.90179
6347000	42.0116	4.2304	7.70723	2.69753
6347500	70.1001	8.79402	12.2208	4.27728
6349500	11.2631	4.90413	13.715	4.80025
6350000	12.3047	3.38829	11.3628	3.97698
6351000	215.579	6.20003	7.23061	2.53071
6352000	18.6411	5.30706	9.94188	3.47966
6353000	34.8137	2.41722	7.16865	2.50903
6354500	147.121	5.10469	10.8176	3.78616
6360500	212.672	6.36064	17.3314	6.06599
6361000	348.522	6.47022	32.7035	11.4462
6406000	11.4389	3.68353	19.11	6.6885
6437500	18.437	3.04125	18.8332	6.59162
6439000	34.4747	5.01046	22.5699	7.89946
6440200	21.4099	3.48495	28.3236	9.91326
6441000	32.4947	6.10266	32.7042	11.4465
6441500	118.357	7.31594	26.1351	9.14729
6442500	17.1342	4.24096	49.6632	17.3821
6446000	29.7639	6.30193	24.615	8.61525
6453600	54.3928	4.26996	19.1268	6.69438
6464100	19.5176	2.55046	2.77206	0.970221
6466500	95.6595	5.18849	9.47181	3.31513
6470800	12.499	3.17923	12.2111	4.27388
6471200	8.01614	2.45998	18.4438	6.45533
6477500	23.0177	3.86928	14.6847	5.13964
6478500	77.7793	4.91225	19.0218	6.65763
6481000	232.525	4.55204	16.9018	5.91563
6483500	159.89	4.91086	13.6865	4.79028
6485500	182.959	6.36897	17.3494	6.07229
6600100	27.1674	5.12549	20.2157	7.07549
6600300	47.4505	4.50198	21.5085	7.52797
6600500	120.496	7.90783	16.2331	5.68159
6600900	105.55	6.40832	18.8265	6.58927
6605850	125.169	5.42199	17.3785	6.08247
6606600	290.174	6.25113	15.2435	5.33522
6608500	407.176	8.02512	15.1624	5.30684
6641400	6.4845	3.70271	12.0525	4.21837
6650500	19.3693	2.95932	16.1185	5.64147
6709530	10.4981	2.84817	5.23573	1.83251
6709910	4.05881	3.49955	10.4584	3.66044
6712000	10.4536	2.26706	9.60775	3.36271
6771000	10.3109	3.78416	14.5749	5.10121
6783500	20.5366	5.14733	12.6356	4.42246
6784000	203.123	2.99389	2.02799	0.709796
6791100	16.5593	5.79951	3.34741	1.17159
6794000	97.473	4.8234	3.57608	1.25163
6797500	81.4461	3.09619	1.29534	0.453369
6798500	68.2308	2.42721	2.45074	0.857759
6799100	28.9472	4.24717	9.44016	3.30406
6799450	428.056	6.01396	24.5875	8.60562
6799500	266.594	5.80248	26.995	9.44825
6803520	43.2196	5.6491	26.9275	9.42462
6803530	92.1968	5.20919	25.7712	9.01992
6804000	84.4941	6.77706	24.2207	8.47724
6808500	508.354	6.9968	22.0586	7.72051
6809500	136.053	5.91409	21.9659	7.68806
6810000	360.141	7.79359	16.6472	5.82652
6811500	475.588	7.23942	25.3636	8.87726
6814000	281.519	7.10336	27.2643	9.5425
6815000	592.119	8.47655	26.3261	9.21413
6817000	233.657	6.46147	24.5952	8.60832
6819500	138.484	5.94517	25.3766	8.88181
6821190	353.473	9.35707	22.5277	7.88469
6835000	15.3863	3.01078	6.82722	2.38953
6839500	16.5719	4.55275	10.119	3.54165
6841000	16.9642	2.69936	12.7459	4.46106
6844000	43.5783	6.53846	9.8903	3.4616
6844900	2.79414	3.22508	15.0433	5.26516
6846000	5.09253	2.45826	16.5388	5.78858
6846500	6.17016	4.94068	11.046	3.8661
6847000	6.4627	3.67961	14.0421	4.91473
6847900	9.85458	3.93327	13.2072	4.62252
6851300	3.39882	3.98623	3.54227	1.23979
6851500	81.2974	3.44793	6.7468	2.36138
6852000	17.7334	4.37254	8.91774	3.12121
6853800	24.1038	5.83999	17.7848	6.22468
6856100	32.257	6.11578	15.4297	5.40039
6856320	19.3847	3.48012	11.5929	4.05751
6858500	20.7619	3.34229	11.3091	3.95818
6859500	14.3765	2.95619	9.44991	3.30747
6860000	5.22937	2.14308	10.8324	3.79134
6860500	93.6257	3.96067	17.3245	6.06358
6863400	7.47403	4.2092	14.7264	5.15424
6863500	22.8024	6.15047	18.4703	6.46461
6867000	43.2121	4.74957	10.1381	3.54833
6869500	158.999	8.99358	19.8527	6.94844
6869950	83.076	8.1825	19.9831	6.99409
6871000	208.726	4.66869	8.36701	2.92845
6871500	54.0946	3.5752	11.2011	3.92039
6871800	149.519	5.00124	10.1781	3.56234
6873000	31.5857	3.4061	4.98125	1.74344
6876000	287.568	9.71993	15.4936	5.42276
6876700	44.4783	6.45384	21.53	7.5355
6878000	66.0337	6.55605	23.74	8.309
6879650	50.9695	3.54794	10.5989	3.70961
6880000	17.2686	5.58371	20.3414	7.11949
6881000	135.625	7.05245	18.742	6.5597
6882510	309.514	9.50447	19.7672	6.91852
6884000	217.132	4.58737	12.2566	4.28981
6884300	12.2482	4.97997	19.3353	6.76735
6885500	111.976	8.57388	28.4621	9.96173
6886500	168.273	5.88405	25.8829	9.05901
6887200	35.2438	6.1614	22.4315	7.85102
6888000	110.325	8.18953	29.9289	10.4751
6888300	232.262	9.62501	23.5769	8.25191
6889200	106.866	8.4142	25.6823	8.9888
6889500	159.124	6.45045	16.2213	5.67745
6890100	467.388	8.66922	29.7299	10.4055
6891500	122.825	8.55904	30.4256	10.649
6892000	165.794	8.58163	28.3838	9.93433
6893500	286.261	9.69537	22.6097	7.91339
6898500	346.194	6.14419	24.4081	8.54284
6899000	243.95	5.89599	24.3513	8.52295
6899500	1155.63	9.49986	26.924	9.4234
6900000	273.976	4.95876	23.8322	8.34127
6902000	1092.85	11.2256	29.5741	10.3509
6908000	136.051	9.66778	22.1338	7.74683
6909500	70.0136	6.13888	22.4366	7.85281
6911000	205.459	8.04634	25.1482	8.80187
6912500	262.247	8.05858	27.9422	9.77977
6914000	156.595	8.69503	24.3906	8.53671
6914500	195.739	7.91891	26.6702	9.33457
6916500	225.078	8.52074	25.4833	8.91915
6917000	220.834	8.50004	24.1405	8.44917
6917380	426	10.8192	24.1623	8.4568
6918740	240.094	5.39948	23.2094	8.12329
6919000	380.616	6.71205	22.0009	7.70031
6919500	193.544	6.89244	20.4031	7.14108
6922000	371.364	8.96306	22.445	7.85575
6927000	379.224	5.522	19.0658	6.67303
6930000	349.301	4.82196	17.4409	6.10431
6932000	136.698	4.46344	15.6034	5.46119
6933500	1162.58	7.92881	15.5274	5.43459
7049000	256.246	5.57563	19.7712	6.91992
7052500	506.269	7.00415	26.1997	9.16989
7054080	440.087	5.20243	18.3462	6.42117
7067000	393.844	4.93801	15.1997	5.31989
7068000	492.43	4.77881	11.4982	4.02437
7068500	623.615	6.39381	13.2835	4.64922
7069500	467.56	7.38398	23.2815	8.14852
7072000	350.357	6.01755	22.312	7.8092
7073500	213.517	5.36258	19.6849	6.88971
7074000	844.643	7.69018	22.1961	7.76863
7075000	684.412	7.76374	12.6585	4.43047
7119500	18.8092	4.42592	12.6466	4.42631
7121500	45.5643	4.41533	17.3941	6.08793
7126300	62.9006	2.63486	8.45232	2.95831
7141600	64.534	6.50678	17.096	5.9836
7141900	68.4024	7.52568	22.4151	7.84528
7142300	4.04804	2.89833	9.03925	3.16374
7144200	47.244	5.47469	23.0213	8.05745
7144780	133.052	3.71834	4.81373	1.68481
7145200	58.6624	2.496	12.2249	4.27872
7145700	40.7801	7.4393	24.5479	8.59176
7147070	445.829	8.14481	26.0998	9.13493
7147800	626.892	9.70341	23.5878	8.25573
7148100	345.317	8.23355	25.5741	8.95093
7149000	193.749	3.21298	8.90745	3.11761
7152500	1522.66	5.76639	16.6663	5.8332
7155590	74.5417	2.09178	1.89521	0.663323
7157500	4.98522	2.14257	4.60453	1.61159
7160000	692.94	3.70268	8.49091	2.97182
7160500	143.071	8.97446	16.2286	5.68001
7167500	201.568	7.97995	25.8034	9.03119
7169800	262.812	7.45994	20.2693	7.09425
7170500	917.919	13.0205	25.5799	8.95296
7172000	530.769	7.8115	20.201	7.07035
7179500	585.445	9.66242	26.884	9.4094
7182000	864.392	9.51276	29.763	10.417
7183500	2230.08	9.07523	27.0452	9.46582
7184000	86.3864	5.37141	26.6853	9.33986
7184600	209.231	7.01215	24.0108	8.40378
7185700	114.032	3.8693	16.8483	5.8969
7186000	471.804	8.03463	21.4047	7.49164
7186400	592.662	6.67212	17.8029	6.23102
7187000	285.173	4.8131	17.4627	6.11195
7189000	795.577	6.57079	17.0804	5.97814
7191220	131.546	4.21426	17.5297	6.13539
7195500	550.166	6.48258	14.7664	5.16824
7197000	305.962	5.37303	15.6696	5.48436
7203000	29.4142	2.51329	24.8605	8.70117
7231000	445.225	8.73931	16.5824	5.80384
7232500	309.297	3.18447	5.36841	1.87894
7233000	65.8549	2.43206	4.84019	1.69407
7233500	29.3915	4.74083	16.9426	5.92991
7236000	41.7407	5.19452	3.11239	1.08934
7241880	39.3776	4.21987	10.0475	3.51662
7247000	262.624	6.14674	16.5335	5.78672
7247500	103.448	5.67802	21.4018	7.49063
7249400	158.563	6.81863	17.1654	6.00789
7257200	229.59	4.18969	13.478	4.7173
7258500	217.317	6.18634	14.2356	4.98246
7261500	725.63	9.05591	14.323	5.01305
7299670	22.4537	5.48843	5.39502	1.88826
7301410	4.65986	4.00555	4.5917	1.60709
7303500	177.401	5.88535	11.3439	3.97036
7308200	151.32	4.51816	7.85304	2.74856
7311500	73.7477	7.62883	27.7691	9.71918
7311800	64.483	4.8291	21.2407	7.43424
7315200	24.4933	7.81509	22.7007	7.94524
7315700	57.4058	8.64856	19.3978	6.78923
7325000	148.107	7.88059	6.67168	2.33509
7328500	518.924	8.75922	13.2616	4.64156
7332500	169.437	7.62757	27.216	9.5256
7334000	453.24	12.325	20.6968	7.24388
7337500	730.266	12.4142	14.707	5.14745
7339000	1082.69	6.53476	15.2205	5.32717
7340500	559.521	5.96076	13.928	4.8748
7341000	275.735	5.39847	12.277	4.29695
7343000	1269.73	10.036	56.3818	19.7336
7346050	46.1976	4.96661	13.3001	4.65503
7349000	249.055	6.21034	12.7723	4.4703
7349500	66.7384	5.78426	24.6668	8.63338
